# Supplementary material
Source: ML conference proceedings conference paper supplement (https://proceedings.mlr.press/v119/lin20f.html)
Supplement: Supplementary file [file lin20f-supp.pdf]

# Supplementary Material for “Improving Generative Imagination in Object-Centric World Models”

## A. Model Details

In this section, we will give a detailed description of each stage, especially those not described in detail in the main text.

For each timestep  $t$ , we will describe the generation of  $\mathbf{z}_t^{\text{ctx}}$ ,  $\tilde{\mathbf{z}}_t$ ,  $\tilde{\mathbf{o}}_t$ ,  $\bar{\mathbf{z}}_t$ ,  $\bar{\mathbf{o}}_t$ ,  $\mathbf{o}_t$ ,  $\mathbf{x}_t$  (in that order), given the full history  $\mathbf{z}_{<t}^{\text{ctx}}$ ,  $\tilde{\mathbf{z}}_{<t}$ , and  $\mathbf{o}_{<t}$ . Generation consists of the following stages:

1. **Context.** Given context history  $\mathbf{z}_{<t}^{\text{ctx}}$ , we generate the new context  $\mathbf{z}_t^{\text{ctx}}$ .
2. **Propagation.** We compute  $\{\tilde{\mathbf{z}}_t^k\}_{k=1}^K$ , and then update the object attributes  $\{\mathbf{o}_{t-1}^k\}_{k=1}^K$  to  $\{\tilde{\mathbf{o}}_t^k\}_{k=1}^K$ .
3. **Discovery.** A grid of  $H \times W$  new object latents  $\{\tilde{\mathbf{z}}_t^{ij}, (i, j) \in \{(1, 1), \dots, (H, W)\}\}$  will be sampled from some predefined prior, and then for each  $(i, j) \in \{(1, 1), \dots, (H, W)\}$ ,  $\tilde{\mathbf{o}}_t^{ij}$  will be obtained by passing each  $\tilde{\mathbf{z}}_t^{ij}$  through some deterministic function. As mentioned in the main text, discovery will only be used during inference but not generation. Here, the discovery priors are only used to regularize inference.
4. **Rendering.** Given the set of propagated objects  $\tilde{\mathbf{o}}_t$  and discovered objects  $\bar{\mathbf{o}}_t$ , we will select a maximum number of  $K$  objects  $\{\mathbf{o}^k\}_{k=1}^K$  with the highest presence value. These objects will also be propagated to the next timestep. We then render the frame  $\mathbf{x}_t$  using the selected objects  $\{\mathbf{o}^k\}_{k=1}^K$ , which generates the foreground image  $\mu_t^{\text{fg}}$  and mask  $\alpha_t$ , and the context latent  $\mathbf{z}_t^{\text{ctx}}$ , which generates the background image  $\mu_t^{\text{bg}}$ .

Below we describe the implementation details of each stage.

### A.1. Context

**Generation.** The prior  $p_\theta(\mathbf{z}_t^{\text{ctx}} | \mathbf{z}_{<t}^{\text{ctx}})$  is implemented as follows:

$$\mathbf{h}_t^{\text{ctx}} = \text{RNN}_{\text{prior}}^{\text{ctx}}(\mathbf{z}_{t-1}^{\text{ctx}}, \mathbf{h}_{t-1}^{\text{ctx}}) \quad (1)$$

$$[\boldsymbol{\mu}_t^{\text{ctx}}, \boldsymbol{\sigma}_t^{\text{ctx}}] = \text{MLP}_{\text{prior}}^{\text{ctx}}(\mathbf{h}_t^{\text{ctx}}) \quad (2)$$

$$\mathbf{z}_t^{\text{ctx}} \sim \mathcal{N}(\boldsymbol{\mu}_t^{\text{ctx}}, \boldsymbol{\sigma}_t^{\text{ctx}}). \quad (3)$$

**Inference.** The posterior  $q_\phi(\mathbf{z}_t^{\text{ctx}} | \mathbf{x}_t, \mathbf{z}_{<t}^{\text{ctx}})$  is implemented as follows:

$$\hat{\mathbf{h}}_t^{\text{ctx}} = \text{RNN}_{\text{post}}^{\text{ctx}}(\mathbf{z}_{t-1}^{\text{ctx}}, \hat{\mathbf{h}}_{t-1}^{\text{ctx}}) \quad (4)$$

$$\mathbf{e}_{\text{enc},t}^{\text{ctx}} = \text{Conv}_{\text{enc}}^{\text{ctx}}(\mathbf{x}_t) \quad (5)$$

$$[\boldsymbol{\mu}_t^{\text{ctx}}, \boldsymbol{\sigma}_t^{\text{ctx}}] = \text{MLP}_{\text{post}}^{\text{ctx}}([\hat{\mathbf{h}}_t^{\text{ctx}}, \mathbf{e}_{\text{enc},t}^{\text{ctx}}]) \quad (6)$$

$$\mathbf{z}_t^{\text{ctx}} \sim \mathcal{N}(\boldsymbol{\mu}_t^{\text{ctx}}, \boldsymbol{\sigma}_t^{\text{ctx}}). \quad (7)$$

### A.2. Propagation

**Generation.** The overall procedure is described in the main text, so we only describe some network implementation details.

The self-interaction encoding  $\mathbf{e}_t^{k,k}$ , pairwise-interaction encoding  $\mathbf{e}_t^{k,j}$ , and the interaction weights  $w_t^{k,j}$  are computed as follows:

$$\mathbf{e}_t^{k,k} = \text{MLP}_{\text{prior}}^{\text{self}}(\mathbf{u}_t^k) \quad (8)$$

$$\mathbf{e}_t^{k,j} = \text{MLP}_{\text{prior}}^{\text{rel}}(\mathbf{u}_t^k, \mathbf{u}_t^j) \quad (9)$$

$$w_t^{k,j} = \text{MLP}_{\text{prior}}^{\text{weight}}(\mathbf{u}_t^k, \mathbf{u}_t^j). \quad (10)$$

Given the hidden state  $\mathbf{h}_t^k$  of the OS-RNN, the state latent  $\tilde{\mathbf{z}}_t^{\text{state},k}$  is computed as follows:

$$[\tilde{\boldsymbol{\mu}}_t^{\text{state},k}, \tilde{\boldsymbol{\sigma}}_t^{\text{state},k}] = \text{MLP}_{\text{prior}}^{\text{state}}(\mathbf{h}_t^k) \quad (11)$$

$$\tilde{\mathbf{z}}_t^{\text{state},k} \sim \mathcal{N}(\tilde{\boldsymbol{\mu}}_t^{\text{state},k}, \tilde{\boldsymbol{\sigma}}_t^{\text{state},k}), \quad (12)$$

and given the state latent  $\tilde{\mathbf{z}}_t^{\text{state},k}$ , the attribute latents  $\mathbf{z}_t^{\text{att},k} = [\mathbf{z}_t^{\text{pres},k}, \mathbf{z}_t^{\text{depth},k}, \mathbf{z}_t^{\text{where},k}, \mathbf{z}_t^{\text{what},k}]$  are computed as follows:

$$[\tilde{\boldsymbol{\rho}}^{\text{pres},k}, \tilde{\boldsymbol{\mu}}_t^{\text{depth},k}, \tilde{\boldsymbol{\sigma}}_t^{\text{depth},k}, \tilde{\boldsymbol{\mu}}_t^{\text{where},k}, \tilde{\boldsymbol{\sigma}}_t^{\text{where},k}, \tilde{\boldsymbol{\mu}}_t^{\text{what},k}, \tilde{\boldsymbol{\sigma}}_t^{\text{what},k}] = \text{MLP}_{\text{prior}}^{\text{att}}(\tilde{\mathbf{z}}_t^{\text{state},k}) \quad (13)$$

$$\tilde{\mathbf{z}}_t^{\text{pres},k} \sim \text{Bernoulli}(\tilde{\boldsymbol{\rho}}^{\text{pres},k}) \quad (14)$$

$$\tilde{\mathbf{z}}_t^{\text{depth},k} \sim \mathcal{N}(\tilde{\boldsymbol{\mu}}_t^{\text{depth},k}, \tilde{\boldsymbol{\sigma}}_t^{\text{depth},k}) \quad (15)$$

$$\tilde{\mathbf{z}}_t^{\text{where},k} \sim \mathcal{N}(\tilde{\boldsymbol{\mu}}_t^{\text{where},k}, \tilde{\boldsymbol{\sigma}}_t^{\text{where},k}) \quad (16)$$

$$\tilde{\mathbf{z}}_t^{\text{what},k} \sim \mathcal{N}(\tilde{\boldsymbol{\mu}}_t^{\text{what},k}, \tilde{\boldsymbol{\sigma}}_t^{\text{what},k}). \quad (17)$$

**Inference.** We only need to describe the implementation of  $q_\phi(\tilde{\mathbf{z}}_t^{\text{state},k} | \mathbf{x}_t, \mathbf{z}_{<t}^{\text{ctx}}, \tilde{\mathbf{z}}_{<t})$ . First, a posterior OS-RNN will be used to update the posterior object state:

$$\hat{\mathbf{h}}_t^k = \text{RNN}_{\text{post}}^{\text{os}}([\mathbf{o}_{t-1}^k, \mathbf{z}_t^{\text{state},k}, \mathbf{e}_{t-1}^{\text{ctx},k}, \mathbf{e}_{t-1}^{\text{rel},k}], \hat{\mathbf{h}}_{t-1}^k). \quad (18)$$

Here,  $\mathbf{e}_{t-1}^{\text{ctx},k}$  is computed using exactly the same process and network as generation, and  $\mathbf{e}_{t-1}^{\text{rel},k}$  is computed using a similar process during generation but with a separate set of posterior networks  $\text{MLP}_{\text{post}}^{\text{self}}$ ,  $\text{MLP}_{\text{post}}^{\text{rel}}$  and  $\text{MLP}_{\text{post}}^{\text{weight}}$ .

Then, a proposal region of the image  $\mathbf{x}_t$  centered at the previous object location  $\mathbf{o}_{t-1}^{xy,k}$  is extracted and encoded. The size  $\mathbf{s}_t^{\text{prop}}$  (2-dimensional for  $(h, w)$ ) of this proposal area is computed from  $\hat{\mathbf{h}}_t^k$ :

$$\mathbf{s}_t^{\text{prop}} = \mathbf{o}_{t-1}^{hw,k} + s^{\text{min}} + (s^{\text{max}} - s^{\text{min}}) \cdot \sigma(\text{MLP}^{\text{prop}}(\hat{\mathbf{h}}_t^k)) \quad (19)$$

Where  $s^{\text{min}}$  and  $s^{\text{max}}$  are hyperparameters that control the minimum and maximum proposal update size. After that, the proposal is extracted and encoded:

$$\mathbf{g}_t^{\text{prop},k} = \text{ST}(\mathbf{x}_t, \mathbf{o}_{t-1}^{xy,k}, \mathbf{s}_t^{\text{prop}}) \quad (20)$$

$$\mathbf{e}_t^{\text{prop},k} = \text{Conv}^{\text{prop}}(\mathbf{g}_t^{\text{prop},k}). \quad (21)$$

Then  $\hat{\mathbf{h}}_t^k$  and  $\mathbf{e}_t^{\text{prop},k}$  will be used to infer  $\tilde{\mathbf{z}}_t^{\text{state},k}$ :

$$[\tilde{\boldsymbol{\mu}}_t^{\text{state},k}, \tilde{\boldsymbol{\sigma}}_t^{\text{state},k}] = \text{MLP}_{\text{post}}^{\text{state}}([\hat{\mathbf{h}}_t^k, \mathbf{e}_t^{\text{prop},k}]), \quad (22)$$

$$\tilde{\mathbf{z}}_t^{\text{state},k} \sim \mathcal{N}(\tilde{\boldsymbol{\mu}}_t^{\text{state},k}, \tilde{\boldsymbol{\sigma}}_t^{\text{state},k}). \quad (23)$$

**Attribute updates.** For this part we describe the details of object attribute update function  $f^{\text{pres}}$ ,  $f^{\text{depth}}$ ,  $f^{\text{where}}$ , and  $f^{\text{what}}$ . These functions are implemented as follows:

$$[\mathbf{g}_t^{\text{depth},k}, \mathbf{g}_t^{\text{where},k}, \mathbf{g}_t^{\text{what},k}] = \sigma(\text{MLP}^{\text{gate}}(\tilde{\mathbf{z}}_t^{\text{state},k})) \quad (24)$$

$$\tilde{\mathbf{o}}_t^{\text{pres},k} = \mathbf{o}_{t-1}^{\text{pres},k} \cdot \tilde{\mathbf{z}}_t^{\text{pres}} \quad (25)$$

$$\tilde{\mathbf{o}}_t^{\text{depth},k} = \mathbf{o}_t^{\text{depth},k} + c^{\text{depth}} \cdot \mathbf{g}_t^{\text{depth},k} \cdot \tilde{\mathbf{z}}_t^{\text{depth},k} \quad (26)$$

$$\tilde{\mathbf{o}}_t^{xy,k} = \mathbf{o}_t^{xy,k} + c^{xy} \cdot \mathbf{g}_t^{xy,k} \cdot \tanh(\tilde{\mathbf{z}}_t^{xy,k}) \quad (27)$$

$$\tilde{\mathbf{o}}_t^{hw,k} = \mathbf{o}_t^{hw,k} + c^{hw} \cdot \mathbf{g}_t^{hw,k} \cdot \tanh(\tilde{\mathbf{z}}_t^{hw,k}) \quad (28)$$

$$\tilde{\mathbf{o}}_t^{\text{what},k} = \mathbf{o}_t^{\text{what},k} + c^{\text{what}} \cdot \mathbf{g}_t^{\text{what},k} \cdot \tanh(\tilde{\mathbf{z}}_t^{\text{what},k}). \quad (29)$$

Note we split  $\mathbf{o}^{\text{where}}$  into  $\mathbf{o}^{hw}$  and  $\mathbf{o}^{xy}$ . Here,  $c^{\text{depth}}$ ,  $c^{xy}$ ,  $c^{hw}$ ,  $c^{\text{what}}$  are real-valued hyperparameters between 0 and 1 that control the degree of update we want. Note that for  $f^{\text{depth}}$ ,  $f^{\text{where}}$ , and  $f^{\text{what}}$ , the corresponding update gates  $\mathbf{g}_t^{\text{depth},k}$ ,  $\mathbf{g}_t^{\text{where},k}$ , and  $\mathbf{g}_t^{\text{what},k}$  will first be computed from  $\tilde{\mathbf{z}}_t^{\text{state},k}$  and used to mask the update values.

### A.3. Discovery

**Generation.** We assume an independent prior for each object:

$$p(\bar{\mathbf{z}}_t^{ij}) = p(\bar{\mathbf{z}}_t^{\text{state},ij})p(\bar{\mathbf{z}}_t^{\text{pres},ij}) \left\{ p(\bar{\mathbf{z}}_t^{\text{depth},ij}) p(\bar{\mathbf{z}}_t^{\text{where},ij}) p(\bar{\mathbf{z}}_t^{\text{what},ij}) \right\}^{\bar{\mathbf{z}}_t^{\text{pres},ij}}. \quad (30)$$

All of these priors are fixed Gaussian distributions with chosen mean and variance except for  $p(\bar{\mathbf{z}}^{\text{pres}})$ , which is a Bernoulli distribution.

**Inference.** We feed in the image  $\mathbf{x}_t$  along with the difference between the  $\mathbf{x}_t$  and the reconstructed background into an encoder to get an encoding of the current image  $\mathbf{e}_t^{\text{img}}$  of shape  $(H, W, C)$ :

$$\mathbf{e}_t^{\text{img}} = \text{Conv}^{\text{disc}}([\mathbf{x}_t, \mathbf{x}_t - \boldsymbol{\mu}_t^{\text{bg}}]) \quad (31)$$

To infer  $\bar{\mathbf{z}}_t$ , besides the current image  $\mathbf{x}_t$ , we also consider the propagated objects  $\{\tilde{\mathbf{o}}_t^k\}_{k=1}^K$  to prevent rediscovering already propagated objects. We adopt the same mechanism in SILOT to condition discovery on propagation. Specifically, for each discovery cell  $(i, j) \in \{(1, 1), \dots, (H, W)\}$ , a vector  $\mathbf{e}_t^{\text{cond},ij}$  will be computed as a weighted sum of all propagated objects  $\{\tilde{\mathbf{z}}_t^k\}_{k=1}^K$ , with the weights computed by passing the relative distance between the propagated object  $\tilde{\mathbf{o}}_t^{xy,k}$  and the cell center  $\mathbf{c}^{ij}$  into a Gaussian kernel:

$$\mathbf{e}_t^{\text{cond},ij} = \sum_{k=1}^K G(\tilde{\mathbf{o}}_t^{xy,k} - \mathbf{c}^{ij}, \sigma^{\text{cond}}) \cdot \text{MLP}^{\text{cond}}(\tilde{\mathbf{o}}_t^k) \quad (32)$$

where  $G$  is a 2-D Gaussian kernel, and  $\sigma^{\text{cond}}$  is a hyperparameter.

The discovered latents will then be computed conditioned on the image features and the encoding of propagated objects:

$$[\bar{\boldsymbol{\mu}}_t^{\text{state},ij}, \bar{\boldsymbol{\sigma}}_t^{\text{state},ij}, \bar{\boldsymbol{\rho}}_t^{\text{pres},ij}, \bar{\boldsymbol{\mu}}_t^{\text{depth},ij}, \bar{\boldsymbol{\sigma}}_t^{\text{depth},ij}, \bar{\boldsymbol{\mu}}_t^{\text{where},ij}, \bar{\boldsymbol{\sigma}}_t^{\text{where},ij}, \bar{\boldsymbol{\mu}}_t^{\text{what},ij}, \bar{\boldsymbol{\sigma}}_t^{\text{what},ij}] = \text{MLP}^{\text{disc}}([\mathbf{e}_t^{\text{img},ij}, \mathbf{e}_t^{\text{cond},ij}]) \quad (33)$$

$$\bar{\mathbf{z}}_t^{\text{state},ij} \sim \mathcal{N}(\bar{\boldsymbol{\mu}}_t^{\text{state},ij}, \bar{\boldsymbol{\sigma}}_t^{\text{state},ij}) \quad (34)$$

$$\bar{\mathbf{z}}_t^{\text{pres},ij} \sim \text{Bernoulli}(\bar{\boldsymbol{\rho}}_t^{\text{pres},ij}) \quad (35)$$

$$\bar{\mathbf{z}}_t^{\text{depth},ij} \sim \mathcal{N}(\bar{\boldsymbol{\mu}}_t^{\text{depth},ij}, \bar{\boldsymbol{\sigma}}_t^{\text{depth},ij}) \quad (36)$$

$$\bar{\mathbf{z}}_t^{\text{where},ij} \sim \mathcal{N}(\bar{\boldsymbol{\mu}}_t^{\text{where},ij}, \bar{\boldsymbol{\sigma}}_t^{\text{where},ij}) \quad (37)$$

$$\bar{\mathbf{z}}_t^{\text{what},ij} \sim \mathcal{N}(\bar{\boldsymbol{\mu}}_t^{\text{what},ij}, \bar{\boldsymbol{\sigma}}_t^{\text{what},ij}) \quad (38)$$

Finally, we compute the object representation  $\bar{\mathbf{o}}_t^{ij}$  using these latents. For  $\bar{\mathbf{o}}_t^{\text{pres},ij}$ ,  $\bar{\mathbf{o}}_t^{\text{depth},ij}$ ,  $\bar{\mathbf{o}}_t^{\text{what},ij}$ , they will just be equal to  $\bar{\mathbf{z}}_t^{\text{pres},ij}$ ,  $\bar{\mathbf{z}}_t^{\text{depth},ij}$ ,  $\bar{\mathbf{z}}_t^{\text{what},ij}$ . For  $\bar{\mathbf{o}}_t^{\text{where},ij} = [\bar{\mathbf{o}}_t^{hw,ij}, \bar{\mathbf{o}}_t^{xy,ij}]$ , we want  $\bar{\mathbf{o}}_t^{hw,ij}$  to be in range  $(0, 1)$  and  $\bar{\mathbf{o}}_t^{xy,ij}$  in range  $(-1, 1)$ . Besides, as in SILOT,  $\bar{\mathbf{z}}_t^{xy,ij}$  is relative to the cell center  $\mathbf{c}^{ij}$ , so we need to transform relative locations to global locations using

$$\bar{\mathbf{o}}_t^{hw,ij} = \sigma(\bar{\mathbf{z}}_t^{hw,ij}) \quad (39)$$

$$\bar{\mathbf{o}}_t^{xy,ij} = \mathbf{c}^{ij} + 2 \cdot \tanh(\bar{\mathbf{z}}_t^{xy,ij})/[W, H] \quad (40)$$

where  $\mathbf{c}^{ij} = 2 \cdot ([i, j] + 0.5)/[W, H] - 1$

### A.4. Rendering

The background image  $\boldsymbol{\mu}_t^{\text{bg}}$  will be decoded from the context latent  $\mathbf{z}_t^{\text{ctx}}$ :

$$\boldsymbol{\mu}_t^{\text{bg}} = \text{Deconv}_{\text{dec}}^{\text{ctx}}(\mathbf{z}_t^{\text{ctx}}) \quad (41)$$

For foreground, we will first select a set of  $K$  objects  $\{\mathbf{o}_t^k\}_{k=1}^K$  from the set of discovered and propagated objects  $\bar{\mathbf{o}}_t \cup \tilde{\mathbf{o}}_t$ . To render the set of selected objects  $\{\mathbf{o}_t^k\}_{k=1}^K$  into the foreground image  $\mu_t^{\text{fg}}$  and foreground mask  $\alpha_t$ , a similar procedure in SILOT is used. First, individual object appearance  $\hat{\mathbf{y}}_t^{\text{att},k}$  and mask  $\hat{\alpha}_t^{\text{att},k}$  are computed from  $\mathbf{o}_t^{\text{what},k}$  and  $\mathbf{o}_t^{\text{pres},k}$ :

$$[\mathbf{y}_t^{\text{att},k}, \alpha_t^{\text{att},k}] = \sigma(\text{Deconv}^{\text{what}}(\mathbf{o}_t^{\text{what},k})) \quad (42)$$

$$\hat{\alpha}_t^{\text{att},k} = \alpha_t^{\text{att},k} \cdot \mathbf{o}_t^{\text{pres},k} \quad (43)$$

$$\hat{\mathbf{y}}_t^{\text{att},k} = \hat{\alpha}_t^{\text{att},k} \cdot \mathbf{y}_t^{\text{att},k} \quad (44)$$

Here,  $\hat{\mathbf{y}}_t^{\text{att},k}$  and  $\hat{\alpha}_t^{\text{att},k}$  will be of a small glimpse size  $(H_g, W_g)$ . We will then transform them into full image size  $(H_{\text{img}}, W_{\text{img}})$  by putting them in an empty canvas using a (inverse) Spatial Transformer:

$$\mathbf{y}_t^k = \text{ST}^{-1}(\hat{\mathbf{y}}_t^{\text{att},k}, \mathbf{o}_t^{\text{where},k}) \quad (45)$$

$$\alpha_t^k = \text{ST}^{-1}(\hat{\alpha}_t^{\text{att},k}, \mathbf{o}_t^{\text{where},k}) \quad (46)$$

Then  $\mu_t^{\text{fg}}$  and  $\alpha_t$  will be computed as pixel-wise weighted sums of these image-sized maps:

$$\mathbf{w}_t^k = \frac{\alpha_t^k \cdot \sigma(\mathbf{o}_t^{\text{depth},k})}{\sum_{j=1}^K \alpha_t^j \cdot \sigma(\mathbf{o}_t^{\text{depth},j})} \quad (47)$$

$$\mu_t^{\text{fg}} = \sum_{k=1}^K \mathbf{w}_t^k \cdot \mathbf{y}_t^k \quad (48)$$

$$\alpha_t = \sum_{k=1}^K \mathbf{w}_t^k \cdot \alpha_t^k \quad (49)$$

The final rendered image will be  $\mu_t = \mu_t^{\text{fg}} + (1 - \alpha_t)\mu_t^{\text{bg}}$ . The likelihood  $p_\theta(\mathbf{x}_t | \mathbf{z}_{\leq t}^{\text{clx}}, \hat{\mathbf{z}}_{\leq t})$  is then

$$p_\theta(\mathbf{x}_t | \mathbf{z}_{\leq t}^{\text{clx}}, \hat{\mathbf{z}}_{\leq t}) = \mathcal{N}(\mathbf{x}_t | \mu_t, \sigma^2 \mathbf{I}) \quad (50)$$

where  $\sigma$  is a hyperparameter.

## B. Architectures, Hyperparameters, and Training

### B.1. Training

For all experiments, we use the Adam (Kingma & Ba, 2014) optimizer with a learning rate of  $1 \times 10^{-4}$  except for the maze dataset. We use a batch size of 16 for all experiments. Gradient clipping (Pascanu et al., 2013) with a maximum norm of 1.0 is applied. For both  $\bar{\mathbf{z}}_k^{\text{pres},ij}$  and  $\hat{\mathbf{z}}_t^{\text{pres},k}$ , we use a Gumbel-Softmax relaxation (Jang et al., 2016) with temperature  $\tau$  to make sampling differentiable.

For experiments on datasets without background, we manually set  $\mu_t^{\text{bg}}$  to empty images. For the maze dataset, we turn off the gradient of the foreground module and only learn to reconstruct background for the first 500 steps. Also, we use a learning rate of  $5 \times 10^{-5}$  instead of  $1 \times 10^{-4}$ .

### B.2. Architectures

All RNNs are implemented as LSTMs (Hochreiter & Schmidhuber, 1997). For all equations that describe RNN recurrence, the notation  $\mathbf{h}$  includes both the hidden state and cell state used in common LSTMs. However, when  $\mathbf{h}$  is used as an input to another network, we use only the hidden state. For all initial states ( $\mathbf{h}_0$ ), we treat them as learnable parameters with unit Gaussian random initialization. For both the prior and posterior object-state RNN, inputs are first embedded with a single fully connected layer denoted by  $\text{MLP}_{\text{prior}}^{\text{os}}$  and  $\text{MLP}_{\text{post}}^{\text{os}}$ .

For all networks that output variances of Gaussian distributions, we apply a softplus function to ensure that the variances are positive. For all networks that output the parameters of Bernoulli distributions (for  $\mathbf{z}^{\text{pres}}$ ), we apply a sigmoid function.

Table 1 lists all networks. Here,  $\text{LSTM}(a, b)$  denotes an LSTM with input size  $a$  and hidden size  $b$ . For MLPs, the Architecture column lists the hidden layer sizes, not including input and output layer. The identity of input and output variables can be found in equations where each network appears, and the dimensions of these variables will be given in Section B.3.

For all network layers except for output layers, we use the CELU (Barron, 2017) activation function. For all convolution layers except for output layers, we use group normalization (Wu & He, 2018) with 16 channels per group. Note that  $\text{MLP}_{\text{prior}}^{\text{state}}$ ,  $\text{MLP}_{\text{post}}^{\text{state}}$ ,  $\text{MLP}_{\text{prior}}^{\text{att}}$ ,  $\text{MLP}^{\text{gate}}$  are implement as stride-1 convolutions to facilitate parallel computation.

In Table 1,  $\text{Conv}^{\text{disc}}$  is implemented with ResNet18 (He et al., 2016) by taking the feature volume from the third block (1/8 of the image size) and applying a stride-1 or -2,  $3 \times 3$  convolution layer depending on the grid size  $(H, W)$  (in this work  $H = W$  and is either 8 or 4) to obtain  $\mathbf{e}_t^{\text{img}}$ . Table 2, Table 3, Table 4, Table 5, and Table 6 list other convolutional encoders and decoders that are referred to in Table 1. In these tables, Subconv denotes a sub-pixel convolution (Shi et al., 2016) implemented by a normal convolution layer plus a PyTorch PixelShuffle operation. The stride of Subconv will be used as a parameter for PixelShuffle.  $\text{GN}(n)$  denotes group normalization with  $n$  groups.

### B.3. Hyperparameters

Table 7 lists the hyperparameters for the 2 LAYER dataset. Hyperparameters for other experiments are similar.

165  
166  
167  
168  
169  
170  
171  
172  
173  
174  
175  
176  
177  
178  
179  
180  
181  
182  
183  
184  
185  
186  
187  
188  
189  
190  
191  
192  
193  
194  
195  
196  
197  
198  
199  
200  
201  
202  
203  
204  
205  
206  
207  
208  
209  
210  
211  
212  
213  
214  
215  
216  
217  
218  
219

Table 1. Network details

| Description                                                                                                       | Symbol                                                             | Architecture   |
|-------------------------------------------------------------------------------------------------------------------|--------------------------------------------------------------------|----------------|
| Context prior RNN                                                                                                 | $\text{RNN}_{\text{prior}}^{\text{ctx}}$                           | LSTM(128, 128) |
| Generate $\mathbf{z}_t^{\text{ctx}}$ from $\mathbf{h}_t^{\text{ctx}}$                                             | $\text{MLP}_{\text{prior}}^{\text{ctx}}$                           | [128, 128]     |
| Decode $\mathbf{z}_t^{\text{ctx}}$ into $\boldsymbol{\mu}_t^{\text{bg}}$                                          | $\text{Deconv}^{\text{ctx}}$                                       | See Table 3    |
| Context posterior RNN                                                                                             | $\text{RNN}_{\text{post}}^{\text{ctx}}$                            | LSTM(128, 128) |
| Infer $\mathbf{z}_t^{\text{ctx}}$ from $[\hat{\mathbf{h}}_t^{\text{ctx}}, \mathbf{x}_t]$                          | $\text{MLP}_{\text{post}}^{\text{ctx}}$                            | [128, 128]     |
| Encode $\mathbf{x}_t$ into $\mathbf{e}_{\text{enc}}^{\text{ctx}}$                                                 | $\text{Conv}^{\text{ctx}}$                                         | See Table 2    |
| Encode $\mathbf{x}_t$ into $\mathbf{e}_t^{\text{img}}$                                                            | $\text{Conv}^{\text{disc}}$                                        | See the text   |
| Encode $\tilde{\mathbf{o}}_t^k$ during discovery                                                                  | $\text{MLP}^{\text{cond}}$                                         | [128, 128]     |
| Infer $\tilde{\mathbf{z}}_k^{ij}$ from $[\mathbf{e}_t^{\text{img},ij}, \mathbf{e}_t^{\text{cond},ij}]$            | $\text{MLP}^{\text{disc}}$                                         | [128, 128]     |
| Prior OS-RNN                                                                                                      | $\text{RNN}_{\text{prior}}^{\text{os}}$                            | LSTM(128, 128) |
| OS-RNN input embedding                                                                                            | $\text{MLP}_{\text{prior}}^{\text{os}}$                            | []             |
| Self-interaction encoding                                                                                         | $\text{MLP}_{\text{prior}}^{\text{self}}$                          | [128, 128]     |
| Pairwise-interaction encoding                                                                                     | $\text{MLP}_{\text{prior}}^{\text{rel}}$                           | [128, 128]     |
| Attention weights over object pairs                                                                               | $\text{MLP}_{\text{prior}}^{\text{weight}}$                        | [128, 128]     |
| Attention on Environment encoder                                                                                  | $\text{Conv}_{\text{att}}^{\text{ctx}}$                            | See Table 4    |
| Generate $\tilde{\mathbf{z}}_t^{\text{state},k}$ from $\mathbf{h}_t^k$                                            | $\text{MLP}_{\text{prior}}^{\text{state}}$                         | [128, 128]     |
| Generate $\tilde{\mathbf{z}}_t^{\text{att},k}$ from $\tilde{\mathbf{z}}_t^{\text{state},k}$                       | $\text{MLP}_{\text{prior}}^{\text{att}}, \text{MLP}^{\text{gate}}$ | [128, 128]     |
| Posterior OS-RNN                                                                                                  | $\text{RNN}_{\text{post}}^{\text{os}}$                             | LSTM(128, 128) |
| OS-RNN input embedding                                                                                            | $\text{MLP}_{\text{post}}^{\text{os}}$                             | []             |
| Predict proposal size $\mathbf{s}_t^{\text{prop},k}$                                                              | $\text{MLP}^{\text{prop}}$                                         | [128, 128]     |
| Encode proposal into $\mathbf{e}_t^{\text{prop},k}$                                                               | $\text{Conv}^{\text{prop}}$                                        | See Table 5    |
| Self-interaction encoding                                                                                         | $\text{MLP}_{\text{post}}^{\text{self}}$                           | [128, 128]     |
| Pairwise-interaction encoding                                                                                     | $\text{MLP}_{\text{post}}^{\text{rel}}$                            | [128, 128]     |
| Attention weights over object pairs                                                                               | $\text{MLP}_{\text{post}}^{\text{weight}}$                         | [128, 128]     |
| Infer $\tilde{\mathbf{z}}_t^{\text{state},k}$ from $[\hat{\mathbf{h}}_t^k, \mathbf{e}_t^{\text{prop},k}]$         | $\text{MLP}_{\text{post}}^{\text{state}}$                          | [128, 128]     |
| Decode $\mathbf{z}_t^{\text{what},ij}$ into $\mathbf{y}_t^{\text{att},ij}, \boldsymbol{\alpha}_t^{\text{att},ij}$ | $\text{Deconv}^{\text{what}}$                                      | See Table 6    |

220  
221  
222  
223  
224  
225  
226  
227  
228  
229  
230  
231  
232  
233  
234  
235  
236  
237  
238  
239  
240  
241  
242  
243  
244  
245  
246  
247  
248  
249  
250  
251  
252  
253  
254  
255  
256  
257  
258  
259  
260  
261  
262  
263  
264  
265  
266  
267  
268  
269  
270  
271  
272  
273  
274

Table 2. Conv<sup>ctx</sup>

| Layer             | Size/Ch. | Stride | Norm./Act.  |
|-------------------|----------|--------|-------------|
| Input             | 3        |        |             |
| Conv $7 \times 7$ | 64       | 2      | GN(4)/CELU  |
| Conv $3 \times 3$ | 128      | 2      | GN(8)/CELU  |
| Conv $3 \times 3$ | 256      | 2      | GN(16)/CELU |
| Conv $3 \times 3$ | 512      | 2      | GN(32)/CELU |
| Flatten           |          |        |             |
| Linear            | 128      |        |             |

Table 3. Deconv<sup>ctx</sup>

| Layer                | Size/Ch. | Stride | Norm./Act. |
|----------------------|----------|--------|------------|
| Input                | 128 (1d) |        |            |
| Reshape              | 128 (3d) |        |            |
| Subconv $3 \times 3$ | 64       | 2      | GN(4)/CELU |
| Subconv $3 \times 3$ | 32       | 2      | GN(2)/CELU |
| Subconv $3 \times 3$ | 16       | 2      | GN(1)/CELU |
| Subconv $3 \times 3$ | 3        | 2      |            |
| Sigmoid              |          |        |            |

Table 4. Conv<sup>att</sup>

| Layer             | Size/Ch. | Stride | Norm./Act. |
|-------------------|----------|--------|------------|
| Input             | 3        |        |            |
| Conv $3 \times 3$ | 16       | 2      | GN(1)/CELU |
| Conv $3 \times 3$ | 32       | 2      | GN(2)/CELU |
| Conv $3 \times 3$ | 64       | 2      | GN(4)/CELU |
| Conv $3 \times 3$ | 128      | 2      | GN(8)/CELU |
| Flatten           |          |        |            |
| Linear            | 128      |        |            |

Table 5. Conv<sup>prop</sup>

| Layer             | Size/Ch. | Stride | Norm./Act. |
|-------------------|----------|--------|------------|
| Input             | 3        |        |            |
| Conv $3 \times 3$ | 16       | 2      | GN(1)/CELU |
| Conv $3 \times 3$ | 32       | 2      | GN(2)/CELU |
| Conv $3 \times 3$ | 64       | 2      | GN(4)/CELU |
| Conv $3 \times 3$ | 128      | 2      | GN(8)/CELU |
| Flatten           |          |        |            |
| Linear            | 128      |        |            |

Table 6. Deconv<sup>what</sup>

| Layer                | Size/Ch. | Stride | Norm./Act. |
|----------------------|----------|--------|------------|
| Input                | 128 (1d) |        |            |
| Reshape              | 128 (3d) |        |            |
| Subconv $3 \times 3$ | 64       | 2      | GN(4)/CELU |
| Subconv $3 \times 3$ | 32       | 2      | GN(2)/CELU |
| Subconv $3 \times 3$ | 16       | 2      | GN(1)/CELU |
| Subconv $3 \times 3$ | 3 + 1    | 2      |            |
| Sigmoid              |          |        |            |

Table 7. Hyperparameters

| Description                                          | Symbol                             | Value                       |
|------------------------------------------------------|------------------------------------|-----------------------------|
| Image size                                           | $(H_{\text{img}}, W_{\text{img}})$ | (64, 64)                    |
| Glimpse size                                         | $(H_g, W_g)$                       | (16, 16)                    |
| Discovery grid size                                  | $(H, W)$                           | (4, 4)                      |
| Dimension of $\mathbf{z}_t^{\text{pres},k}$          |                                    | 1                           |
| Dimension of $\mathbf{z}_t^{\text{depth},k}$         |                                    | 1                           |
| Dimension of $\mathbf{z}_t^{\text{where},k}$         |                                    | 4                           |
| Dimension of $\mathbf{z}_t^{\text{what},k}$          |                                    | 64                          |
| Dimension of $\mathbf{z}_t^{\text{state},k}$         |                                    | 128                         |
| Dimension of $\mathbf{z}_t^{\text{ctx}}$             |                                    | 128                         |
| Dimension of $\mathbf{e}_t^{\text{img},ij}$          |                                    | 128                         |
| Dimension of $\mathbf{e}_t^{\text{cond},ij}$         |                                    | 128                         |
| Dimension of $\mathbf{e}_t^{\text{prop},k}$          |                                    | 128                         |
| Dimension of $\mathbf{e}_t^{k,k}$                    |                                    | 128                         |
| Dimension of $\mathbf{e}_t^{k,j}$                    |                                    | 128                         |
| Dimension of $\mathbf{e}_t^{\text{enc},t}$           |                                    | 128                         |
| Dimension of $\mathbf{e}_t^{\text{ctx},k}$           |                                    | 128                         |
| Training sequence length                             | $T$                                | [2:20:2]                    |
| Curriculum milestones                                |                                    | [10k:90k:10k]               |
| #objects to select                                   | $K$                                | 10                          |
| Likelihood variance                                  | $\sigma$                           | 0.2                         |
| AOE size                                             | $s^{\text{ctx}}$                   | 0.25                        |
| Gaussian kernel sigma                                | $\sigma^{\text{cond}}$             | 0.1                         |
| Rejection IOU threshold                              |                                    | 0.8                         |
| Discovery dropout                                    |                                    | 0.5                         |
| Auxiliary KL parameter                               | $p$                                | $1 \times 10^{-10}$         |
| Gumbel-softmax temperature                           | $\tau$                             | 1.0                         |
| $\bar{\mathbf{z}}_t^{\text{pres},ij}$ prior          |                                    | Bern( $1 \times 10^{-10}$ ) |
| $\bar{\mathbf{z}}_t^{\text{depth},ij}$ prior mean    |                                    | 0                           |
| $\bar{\mathbf{z}}_t^{\text{depth},ij}$ prior stdev   |                                    | 1                           |
| $\bar{\mathbf{z}}_t^{xy,ij}$ prior mean              |                                    | 0                           |
| $\bar{\mathbf{z}}_t^{xy,ij}$ prior stdev             |                                    | 1                           |
| $\bar{\mathbf{z}}_t^{hw,ij}$ prior mean              |                                    | -1.5                        |
| $\bar{\mathbf{z}}_t^{hw,ij}$ prior stdev             |                                    | 0.3                         |
| $\bar{\mathbf{z}}_t^{\text{what},ij}$ prior mean     |                                    | 0                           |
| $\bar{\mathbf{z}}_t^{\text{what},ij}$ prior stdev    |                                    | 1                           |
| For updating $\tilde{\mathbf{o}}_t^{\text{depth},k}$ | $c^{\text{depth}}$                 | 1                           |
| For updating $\tilde{\mathbf{o}}_t^{xy,k}$           | $c^{xy}$                           | 0.1                         |
| For updating $\tilde{\mathbf{o}}_t^{hw,k}$           | $c^{hw}$                           | 0.3                         |
| For updating $\tilde{\mathbf{o}}_t^{\text{what},k}$  | $c^{\text{what}}$                  | 0.2                         |
| Minimum proposal size                                | $s^{\text{min}}$                   | 0.0                         |
| Maximum proposal size                                | $s^{\text{max}}$                   | 0.2                         |

---

## 275 C. Dataset Details

### 276 C.1. Bouncing Balls

277 In all settings, the balls bounce off the walls of the frame,  
278 and no new balls are introduced in the middle of an episode.  
279 Each episode has a length of 100. We split our data into  
280 10,000 episodes for the training set, and 200 episodes each  
281 for the validation set and test set.

282 In both the OCCLUSION and INTERACTION settings, there  
283 are 3 balls each with a color drawn from a set of 5 colors  
284 (blue, red, yellow, fuchsia, aqua), but for the OCCLUSION  
285 case we do not allow duplicate colors.

### 286 C.2. Random Single Ball

287 In this dataset, a single ball moves down the center of the  
288 frame for 9 timesteps. After 5 timesteps, the ball randomly  
289 changes direction and moves towards either the bottom  
290 left corner or the bottom right corner for the remaining  
291 4 timesteps. We split our data into 10,000 episodes for the  
292 training set, and 100 episodes each for the validation set and  
293 test set.

### 294 C.3. Maze

295 The mazes are created using the `mazelib` library<sup>1</sup> and then  
296 removing dead ends manually. For the first frame, 3 or 4  
297 agents of a random color drawn from 6 colors (red, lime,  
298 blue, yellow, cyan, magenta) are randomly placed in the  
299 corridors. The agents only move within the corridors and  
300 continue in a straight path until it reaches an intersection. It  
301 then randomly chooses a path, each with equal probability.  
302 Each episode has a sequence length of 99. We split our data  
303 into 10,000 episodes for the training set, and 100 episodes  
304 each for the validation set and test set.

### 305 C.4. 3D Interactions

306 We generate the 3D Interactions dataset using Blender (Com-  
307 munity, 2018), with the same base scene and object prop-  
308 erties as the CLEVR dataset (Johnson et al., 2016). In this  
309 dataset, we split our dataset into 2920 episodes for training,  
310 and 200 episodes for validation and test. Each episode has a  
311 length of 100.

312 We use three different objects (sphere, cylinder, cube), two  
313 different materials (rubber, metal), three different sizes, and  
314 five different colors (pink, red, blue, green, yellow) to gen-  
315 erate the scenes. All objects move on a smooth surface  
316 without friction.

317 To generate the dataset, we randomly put 3 to 5 objects  
318 in the camera scene, and launch a sphere into the scene  
319 colliding with other objects. The appearance and incident

320 <sup>1</sup><https://github.com/theJollySin/mazelib>

angle of this initial sphere are also randomly selected.

## 321 D. Experiment Details

322 For all experiments that require generation, we set  $\bar{z}_t^{\text{pres},k}$   
323 to 1 for all timesteps at test time to ensure that objects  
324 do not disappear. Besides, we turn off discovery after the  
325 first timestep. For the bouncing ball experiments, during  
326 generation, we directly take the mean of each latent instead  
327 of sampling for all models since no stochasticity is involved.

### 328 D.1. Bouncing Balls

329 We draw random sequences of length 20 for training. During  
330 testing, for each sequence of length 100, we condition on the  
331 first 10 frames and generate the following. We use 5 random  
332 seeds to run the experiments per model per dataset. All  
333 models were trained till full convergence and the results are  
334 computed using the model checkpoints that achieve the best  
335 performances on the validation set. For quantitative results,  
336 G-SWM is trained for 160000 steps for the INTERACTION,  
337 OCCLUSION, and 2 LAYER settings, and 120000 steps for  
338 the 2 LAYER-D settings.

### 339 D.2. Random Single Ball

340 We use full sequences of length 9 for training. At test time,  
341 each model is provided the first 5 timesteps of the ground  
342 truth, before the ball changes direction, and predicts the  
343 final 4 timesteps.

### 344 D.3. Maze

345 We use sequences of length 10 for training. During testing,  
346 we provide 5 ground truth timesteps as input. For quantita-  
347 tive results, G-SWM, including its variants, are trained for a  
348 maximum of 500000 steps.

### 349 D.4. 3D Interactions

350 For this dataset, we use sequences of length 20 for training.  
351 However, since most interactions end after 30 steps, we  
352 draw training sequences only from the first 30 steps. During  
353 testing, for each test sequence of length 100, we provide the  
354 first 10 frames as input and generate the following frames.

## 355 E. Additional Results

356 **SILOT.** We also test SILOT (Crawford & Pineau, 2020) on  
357 the four bouncing ball datasets and the results are shown in  
358 Figure 1. Being a very similar model to SCALOR, it can  
359 handle frequent occlusions and is scalable, but cannot handle  
360 the ball collisions well in the INTERACTION, 2 LAYER, and  
361 2 LAYER-D settings, despite having a simple distance-based  
362 interaction module.

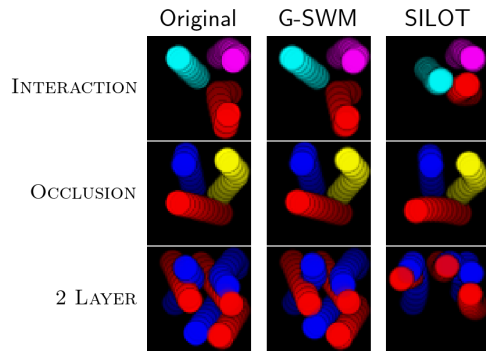

Figure 1. Generated frames of SILOT on the bouncing ball datasets.

**Tracking Performance.** Table 8 shows the tracking performance for the bouncing ball datasets. For tracking, we report the Multi-Object Tracking Accuracy (MOTA) (Milan et al., 2016), with an IoU threshold of 0.5.

**Additional Visualizations.** Figure 2 and Figure 3 show visualizations of G-SWM on the two 2 LAYER datasets. Figure 4 and Figure 5 show additional results on the Maze and 3D datasets respectively.

## References

Barron, J. T. Continuously differentiable exponential linear units. *arXiv preprint arXiv:1704.07483*, 2017.

Community, B. O. *Blender - a 3D modelling and rendering package*. Blender Foundation, Stichting Blender Foundation, Amsterdam, 2018. URL <http://www.blender.org>.

Crawford, E. and Pineau, J. Exploiting spatial invariance for scalable unsupervised object tracking. In *AAAI*, pp. 3684–3692. AAAI Press, 2020.

He, K., Zhang, X., Ren, S., and Sun, J. Deep residual learning for image recognition. In *Proceedings of the IEEE conference on computer vision and pattern recognition*, pp. 770–778, 2016.

Hochreiter, S. and Schmidhuber, J. Long short-term memory. *Neural computation*, 9(8):1735–1780, 1997.

Jang, E., Gu, S., and Poole, B. Categorical reparameterization with gumbel-softmax. *arXiv preprint arXiv:1611.01144*, 2016.

Johnson, J. E., Hariharan, B., van der Maaten, L., Fei-Fei, L., Zitnick, C. L., and Girshick, R. B. Clevr: A diagnostic dataset for compositional language and elementary visual reasoning. *2017 IEEE Conference on Computer Vision and Pattern Recognition (CVPR)*, pp. 1988–1997, 2016.

Kingma, D. P. and Ba, J. Adam: A method for stochastic optimization. *arXiv preprint arXiv:1412.6980*, 2014.

Milan, A., Leal-Taixé, L., Reid, I. D., Roth, S., and Schindler, K. Mot16: A benchmark for multi-object tracking. *ArXiv*, abs/1603.00831, 2016.

Pascanu, R., Mikolov, T., and Bengio, Y. On the difficulty of training recurrent neural networks. In *ICML (3)*, volume 28 of *JMLR Workshop and Conference Proceedings*, pp. 1310–1318. JMLR.org, 2013.

Shi, W., Caballero, J., Huszár, F., Totz, J., Aitken, A. P., Bishop, R., Rueckert, D., and Wang, Z. Real-time single image and video super-resolution using an efficient sub-pixel convolutional neural network. In *Proceedings of the IEEE conference on computer vision and pattern recognition*, pp. 1874–1883, 2016.

Wu, Y. and He, K. Group normalization. In *Proceedings of the European Conference on Computer Vision (ECCV)*, pp. 3–19, 2018.

385  
 386  
 387  
 388  
 389  
 390  
 391  
 392  
 393  
 394  
 395  
 396  
 397  
 398  
 399  
 400  
 401  
 402  
 403  
 404  
 405  
 406  
 407  
 408  
 409  
 410  
 411  
 412  
 413  
 414  
 415  
 416  
 417  
 418  
 419  
 420  
 421  
 422  
 423  
 424  
 425  
 426  
 427  
 428  
 429  
 430  
 431  
 432  
 433  
 434  
 435  
 436  
 437  
 438  
 439

Table 8. Tracking performance on the bouncing ball datasets.

|             | G-SWM                                 | SCALOR              | STOVE                                 |
|-------------|---------------------------------------|---------------------|---------------------------------------|
| INTERACTION | $0.9870 \pm 0.0032$                   | $0.9688 \pm 0.0101$ | <b><math>0.9979 \pm 0.0005</math></b> |
| OCCLUSION   | <b><math>0.9919 \pm 0.0013</math></b> | $0.9447 \pm 0.0119$ | $0.9618 \pm 0.0023$                   |
| 2 LAYER     | <b><math>0.9967 \pm 0.0041</math></b> | $0.9686 \pm 0.0102$ | —                                     |
| 2 LAYER-D   | <b><math>0.9756 \pm 0.0066</math></b> | $0.9501 \pm 0.0087$ | —                                     |

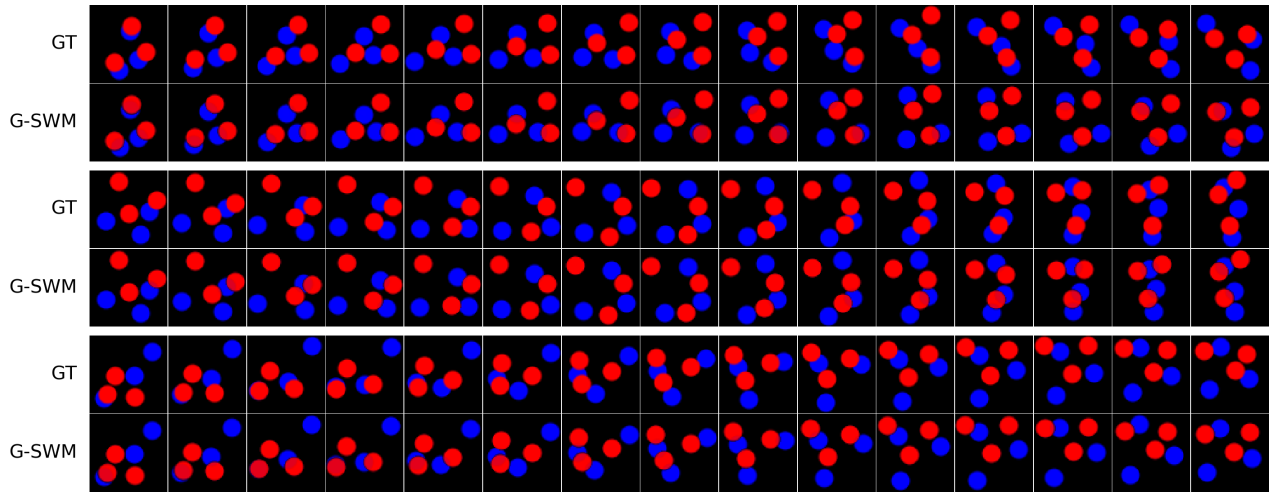

Figure 2. G-SWM on the 2 LAYER dataset

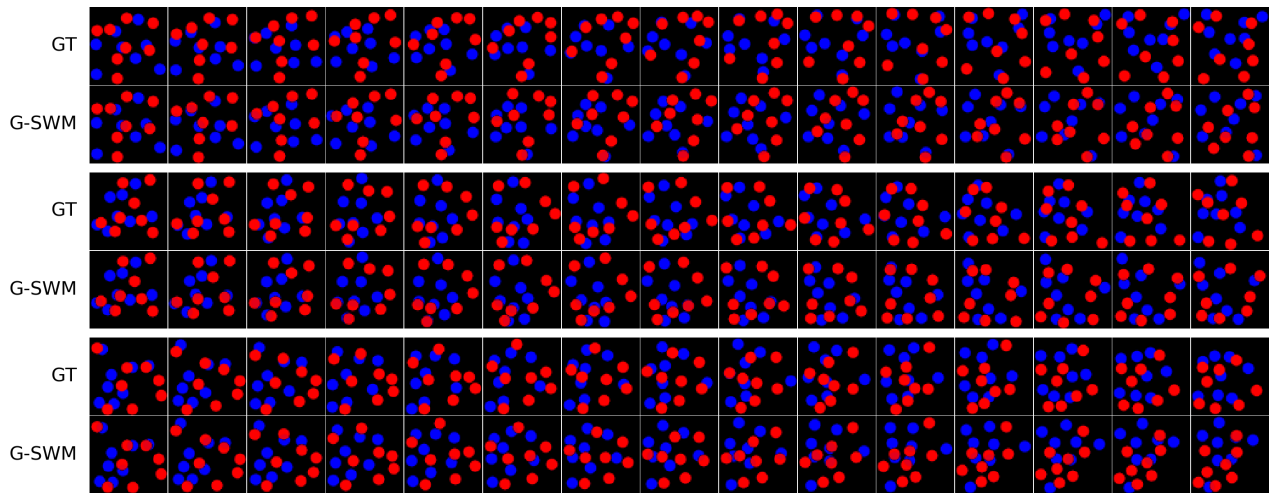

Figure 3. G-SWM results on the 2 LAYER-D DATASET



440  
441  
442  
443  
444  
445  
446  
447  
448  
449  
450  
451  
452  
453  
454  
455  
456  
457  
458  
459  
460  
461  
462  
463  
464  
465  
466  
467  
468  
469  
470  
471  
472  
473  
474  
475  
476  
477  
478  
479  
480  
481  
482  
483  
484  
485  
486  
487  
488  
489  
490  
491  
492  
493  
494

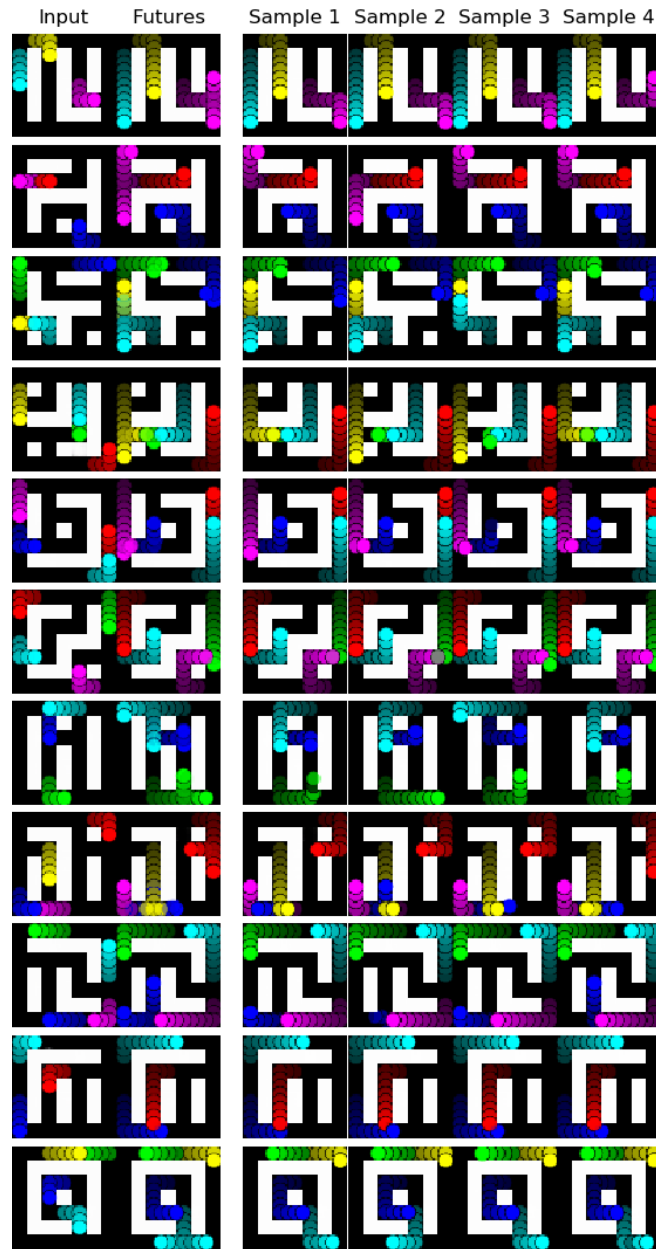

Figure 4. Maze

495  
496  
497  
498  
499  
500  
501  
502  
503  
504  
505  
506  
507  
508  
509  
510  
511  
512  
513  
514  
515  
516  
517  
518  
519  
520  
521  
522  
523  
524  
525  
526  
527  
528  
529  
530  
531  
532  
533  
534  
535  
536  
537  
538  
539  
540  
541  
542  
543  
544  
545  
546  
547  
548  
549

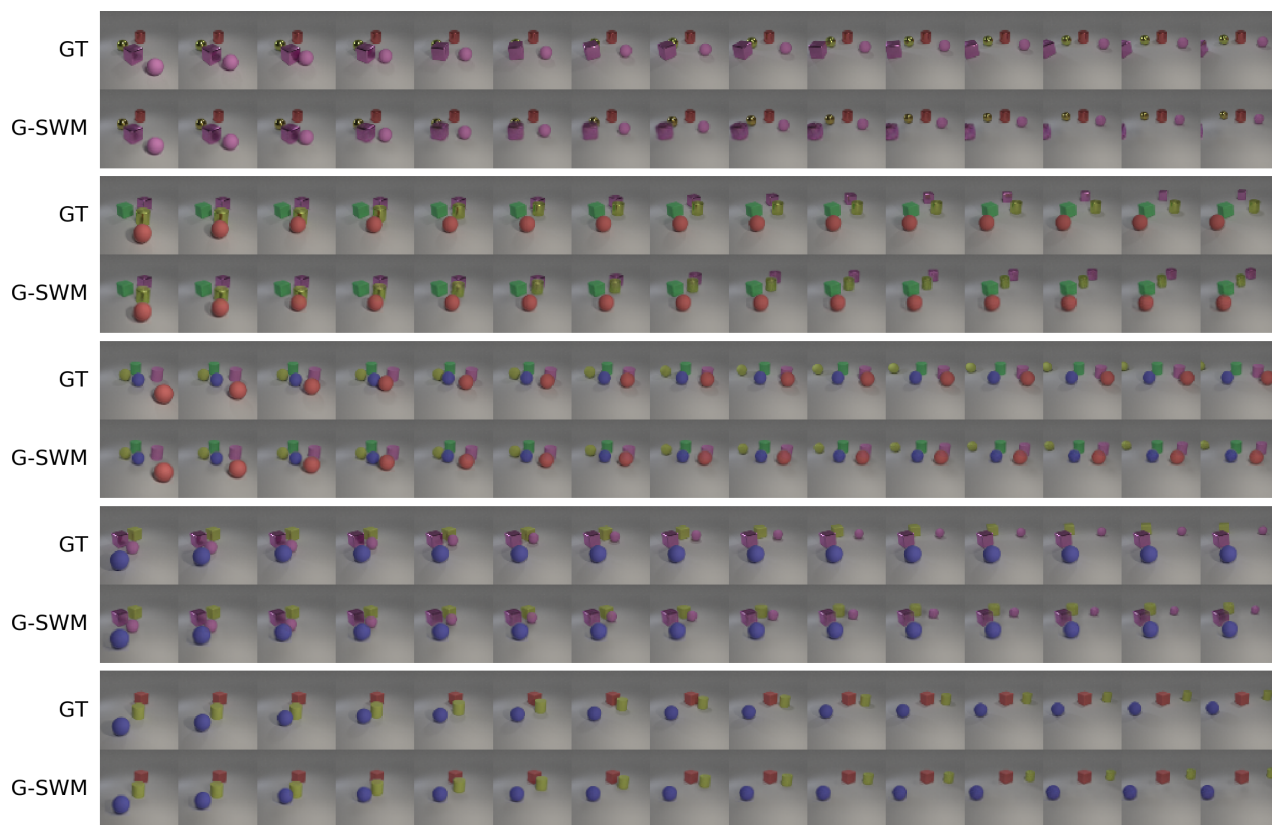

Figure 5. G-SWM results on the 3D-Interactions dataset
